# Supplementary material for: Revealing elasticity of largely deformed cells flowing along confining microchannels
Source: PubMed Central journal article supplement (PMC9076943; doi:10.1039/c7ra10750a), 2018-01-03
Supplement: RA-008-C7RA10750A-s001.pdf [file RA-008-C7RA10750A-s001.pdf]

# 1 **Revealing Elasticity of Largely Deformed Cells Flowing along** 2 **Confining Microchannels**

3  
4 Shuhuan Hu<sup>a\*</sup>, Ran Wang<sup>a</sup>, Chi Man Tsang<sup>b</sup>, Sai Wah Tsao<sup>b</sup>, Dong Sun<sup>ad</sup> and Raymond  
5 H. W. Lam<sup>acd\*</sup>  
6

7 <sup>a</sup> Department of Mechanical and Biomedical Engineering, City University of Hong Kong,  
8 Hong Kong  
9

10 <sup>b</sup> School of Biomedical Sciences, University of Hong Kong, Hong Kong

11 <sup>c</sup> Centre for Biosystems, Neuroscience, and Nanotechnology, City University of Hong  
12 Kong, Hong Kong  
13

14 <sup>d</sup> City University of Hong Kong Shenzhen Research Institute, Shenzhen, China  
15

16 \* Correspondence should be addressed to S Hu (email: shuhuanhu2-c@my.cityu.edu.hk;  
17 Tel: +852-3442-7174) or RHW Lam (email: rhwlam@cityu.edu.hk; Tel: +852-3442-  
18 8577; Fax: +852-3442-0172).  
19  
20

## 21 **Electronic Supplementary Information (ESI)**

### 22 **The elasticity microcytometer**

23 The elasticity microcytometer is composed of two arrays of confining microchannels.  
24 (**Fig. S1a**) Each channel is with an inlet width  $W_{in} = 30 \mu\text{m}$ , outlet width  $W_{out} = 4 \mu\text{m}$ ,  
25 channel length  $L_{channel} = 300 \mu\text{m}$  and channel height  $H = 50 \mu\text{m}$ . Four bypass channels  
26 with the width of  $50 \mu\text{m}$  are located at the ends of the arrays to ensure the stability of the  
27 inlet pressures of the confining channels. As shown in **Fig. S1b**, the fluidic resistance can  
28 be simplified by four resistance elements, in which  $R_{in} \approx R_{out} \ll R_{bypass} \ll R_{channel}$  holds;

1 thus the overall fluidic resistance is always approximately the  $R_{bypass}$  whether the cells are  
 2 trapped in the confining channels or not. Hence a steady inlet pressure of the  
 3 microchannels is maintained in the experiments.

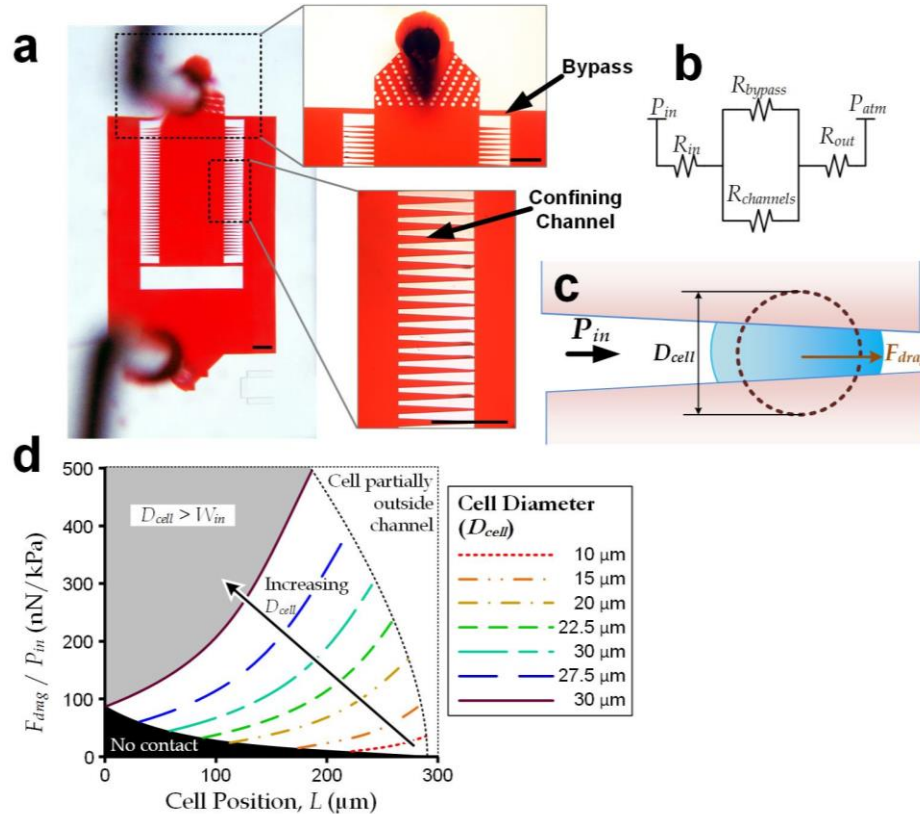

4  
 5 **Figure S1.** (a) Design of the elasticity microcytometer (adapted from <sup>1</sup>). Scale bars: 300  
 6  $\mu\text{m}$ . (b) Diagram of the fluidic resistance of the device. (c) Concept figure of a cell driven  
 7 by the hydraulic dragging force  $F_{drag}$ . (d) Comsol simulation results for calculating the  
 8 hydraulic dragging force  $F_{drag}$ . The simulation results of cells with different sizes at  
 9 different locations are combined (adapted from <sup>2</sup>).

10

### 11 Simulation

12 To obtain the hydraulic forces exerted onto the encapsulated cells, we performed finite  
 13 element analysis using commercial software (COMSOL Multiphysics 4.2, Burlington,  
 14 MA, USA) of multiple models of the confining microchannel structure containing an  
 15 encapsulated cell with different diameters ( $D_{cell}$ ) at different encapsulated position ( $L$ ), in  
 16 order to obtain the hydraulic pressure profile exerted onto the encapsulated cell as a  
 17 function of  $D_{cell}$  and  $L$  along the channel. The position and deformed shape of a cell were

1 preset in the geometry of the simulation and we set the same channel dimensions (*i.e.*  
2 height  $H_{channel}$ , length  $L_{channel}$ , inlet width  $W_{in}$  and outlet width  $W_{out}$ ) identical to the  
3 fabricated device in all the models, whereas in each model the deformed cell diameter  
4 ( $D_{deform}$ ) was computed using **Eqn. 7**. We then obtained the resultant drag force  $F_{drag}$  by  
5 integrating the simulated pressure profile over the cell surface. By performing a series of  
6 simulations of multiple models of with different location and deformation of an  
7 encapsulated cell, we were able to obtain the relation among the drag force  $F_{drag}$ , the  
8 location  $L$  and cell diameter  $D_{cell}$ .

9

### 10 **Deviation analysis of the three models**

11 The whole cell strain could be calculated by  $\varepsilon = \frac{1}{V} \int y dV$ , where  $y$  is the displacement of  
12 the finite elements in a deformed cell along the direction perpendicular to the confining  
13 microchannels. The whole cell strain could be expressed as:

$$14 \quad \varepsilon = \left(1 - \frac{W_{deform}}{D_{cell}}\right)^2 \left(1 + \frac{W_{deform}}{2D_{cell}}\right) \quad (S1)$$

15

16 The strains of MCF-10A cells were:  $0.081 \pm \text{SD } 0.059$  at 100 Pa,  $0.172 \pm \text{SD } 0.073$  at  
17 200 Pa,  $0.218 \pm \text{SD } 0.086$  at 300 Pa and  $0.270 \pm \text{SD } 0.109$  at 400Pa.

18

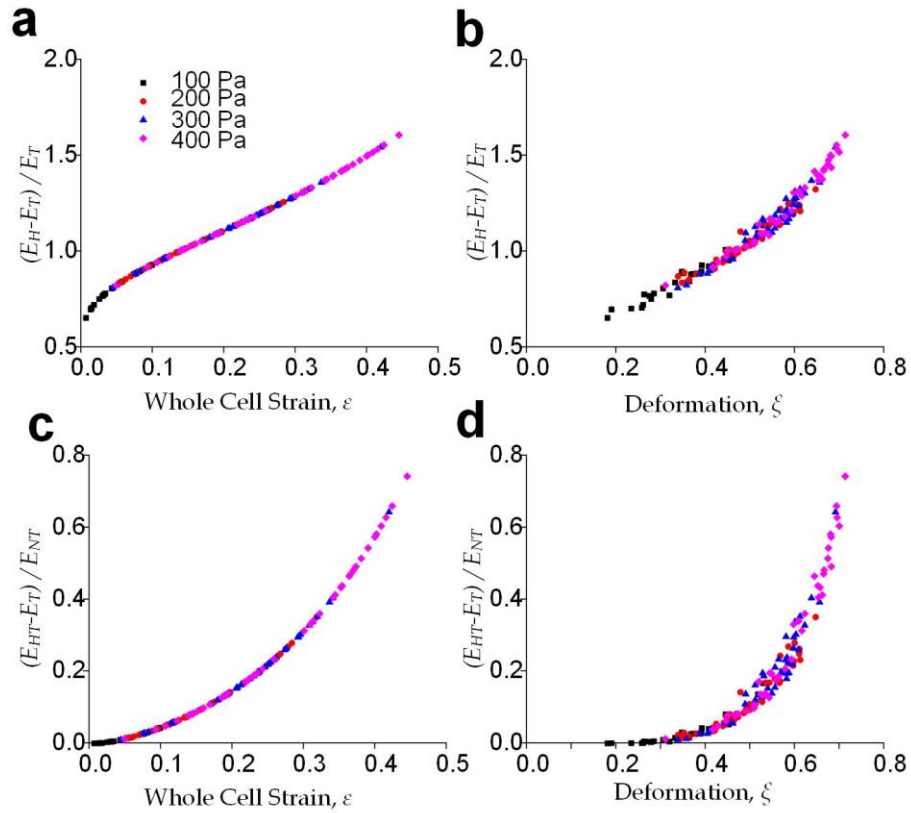

1

2 **Figure S2.** Deviation analysis of the three models.  $E_H$ ,  $E_T$  and  $E_{HT}$  are the Young's  
 3 moduli calculated by the Hertz model, the Tataro model and the hyperelastic Tataro  
 4 model, respectively. (a, b) The deviations between and that originate from the geometric  
 5 correction is almost linear; (c, d) The deviations between and that originate from the  
 6 hyperelastic correction is strongly hyperelastic.

7

1  
2  
3

## Statistics of the cellular and nuclear sizes

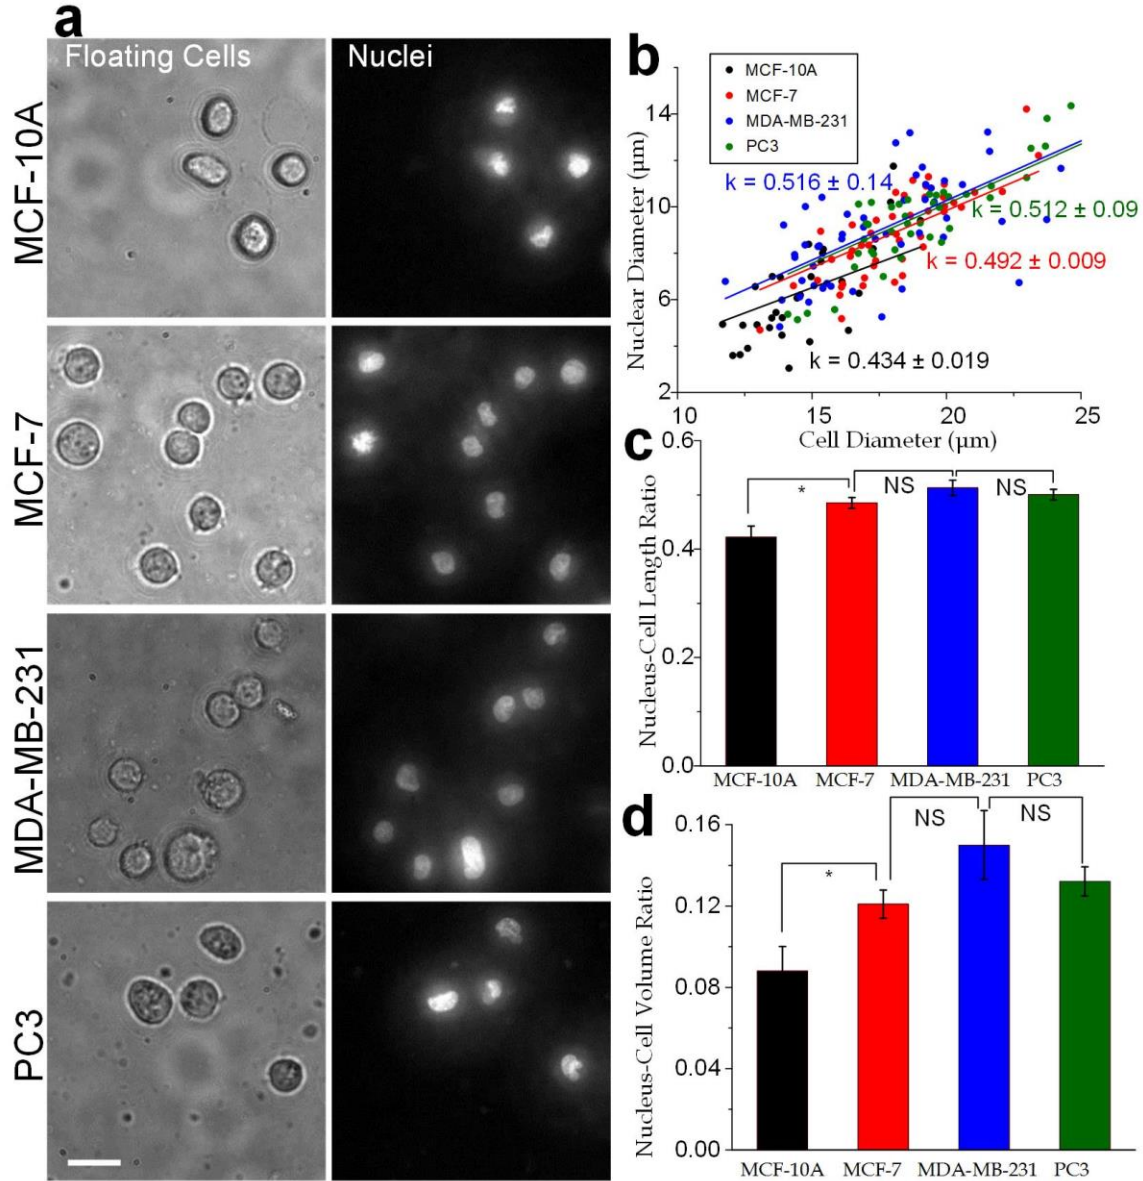

4  
5 **Figure S3.** (a) The images of floating cells and the nuclei; scale bar: 20  $\mu\text{m}$ . (b)  
6 Scattering plots of nuclear diameter versus cell diameter of MCF-10A (n = 30), MCF-7  
7 (n = 46), MDA-MB-231 (n = 43) and PC3 cells (n = 41). The linear fitting was conducted  
8 by the least-squares method under the condition of intercept = 0. (c) Nucleus-cell length  
9 ratio and (d) nucleus-cell volume ratio of the three types of cells. Error bars: S.E.M. \*  
10 indicates  $p < 0.01$ .

1

2

### 3 **Reference**

- 4 1. S. Hu, G. Liu, W. Chen, X. Li, W. Lu, R. H. Lam and J. Fu, *small*, 2016, **12**, 2300-2311.
- 5 2. S. Hu and R. H. Lam, *Microfluidics and Nanofluidics*, 2017, **21**, 68.

6
